# Supplementary material
Source: PubMed Central journal article supplement (PMC4169973)
Supplement: pnas.201415357SI.pdf [file pnas.201415357SI.pdf]

# Supporting Information

Brennan et al. 10.1073/pnas.1415357111

## SI Materials and Methods

**Lipids and Source Materials for Lipid Extractions.** Use of human tissues and animals was approved by the Brigham and Women's Hospital institutional review board and the Dana-Farber Cancer Institute Animal Care and Use Committee, respectively. C57BL/6 mice were from Jackson Laboratories. Whole-fat cow's milk was from Hood or Nestle. Skim cow's milk was from Nestle. Human milk samples were from Mothers' Milk Bank Northeast. Mouse milk was collected from C57BL/6 mothers of suckling pups aged 5–14 d as described (1). Similac advance was used as a cow's milk-based infant formula. Soy milk was from White Wave Foods. Whey and casein were from Sigma. Calf thymus polar lipids were extracted from three pooled, freshly collected specimens (Research 87). Mouse thymus polar lipids were from 6-wk-old C57BL/6 female mice. FBS was from Gemini Bio (BenchMark) or Thermo Scientific (HyClone). Human, mouse, rat, rabbit, and horse sera were from Atlanta Biologicals. Sheep, pig, and chicken sera were from Sigma. Goat serum was from Atlanta Biologicals or Sigma. Fish serum (SeaGrow) was from East Coast Bio.  $\beta$ -GlcCer d18:1/24:1,  $\beta$ -GlcCer d18:1/18:1,  $\beta$ -GlcCer d18:1/18:0,  $\beta$ -GlcCer d18:1/16:0, ceramide d18:1/24:1, and phosphatidylserine were from Avanti Polar Lipids. Cow's milk GlcCer, Gaucher's spleen GlcCer, Soy GlcCer, and diganglioside GD1a were from Matreya.  $\alpha$ -GlcCer d18:1/24:1 and  $\alpha$ -GlcCer d18:0/26:0 were synthesized as described (2). In some figure legends, the sphingoid base is not indicated for space considerations, and was d18:1 where omitted.

**Polar Lipid Extractions.** Lipid extraction methods for lyophilized milk and thymus samples have been described (3). Serum lipids were extracted using a modified Folch method (4). Briefly, 10 volumes of 2:1 CHCl<sub>3</sub>:CH<sub>3</sub>OH were added to serum and vortexed. The aqueous upper phase containing precipitated proteins was removed. To the lower phase, 0.2 volumes of water was added, and the mixture vortexed. The lower layer from the resulting biphasic system contained the polar lipids including GlcCer, and was dried down. The dried lipids were resuspended in 3.3 volumes 10:1 CH<sub>3</sub>OH:water (vol/vol) and biphased against 3.3 volumes petroleum ether three times to remove nonpolar lipids. Six volumes of CHCl<sub>3</sub> and 2 volumes water were added to the lower methanolic phase. From the resulting biphasic system, the lower phase was dried to recover polar lipids.

**TLC.** HPLC grade water, CHCl<sub>3</sub>, CH<sub>3</sub>OH, isopropanol, and hexane were from Fisher Scientific. 10-cm aluminum or plastic silica gel 60 TLC plates were used (EMD Millipore Chemicals). For normal phase TLC, the mobile phase was 65:25:3.75 CHCl<sub>3</sub>:CH<sub>3</sub>OH:water (vol/vol/vol). For HICMW TLC, the mobile phase was 25:35:0.75:35:5 hexane:isopropanol:CHCl<sub>3</sub>:CH<sub>3</sub>OH:water (vol/vol/vol/vol/vol). For preparative TLC, lipids from the indicated retention time were recovered from the scraped silica by vortexing in 2:1 CHCl<sub>3</sub>:CH<sub>3</sub>OH (vol/vol). Lipids were visualized with  $\alpha$ -naphthol/sulfuric acid (Sigma) followed by charring.

**GCase Digestion.** Recombinant human lysosomal glucocerebrosidase, Velaglucease Alfa (5), was from Shire. GCase was reconstituted per the manufacturer's instructions and stored at  $-80^{\circ}\text{C}$ . Digestions were carried out as previously described (6), with some modifications, in 50 mM citrate/50 mM phosphate buffer pH 5.5 with 0.25% sodium taurocholate and 0.5 mg/mL BSA (all digestion buffer components from Sigma). The lipid for digestion was dried and resuspended in the reaction mixture at up to

250  $\mu\text{g}/\text{mL}$  with a 1:20 molar ratio of phosphatidylserine added (7), and the mixture was sonicated for 30 seconds. GCase was added at 1 U per mg of lipid, and the digestion was carried out at  $37^{\circ}\text{C}$  for 16 h on an orbital shaker. To recover lipids from the aqueous reaction mixture, 5 volumes of 2:1 CHCl<sub>3</sub>:CH<sub>3</sub>OH were added, followed by vortexing for 15 min. The lower phase was recovered and dried. The GlcCer retention time was recovered from this crude extract by normal phase preparative TLC for assay.

**In Vitro Activity Assays.** For mouse assays with the invariant natural killer T (iNKT) cell hybridoma DN32 (8) and CD1d-transfected (RAW-CD1d) or untransfected (RAW-WT) RAW-264.7 cells were used (9). DN32 cells ( $5 \times 10^4$ ) were cultured with  $5 \times 10^4$  antigen-presenting cells per well in flat-bottom 96-well plates for 16 h. Where indicated, L363 or mouse IgG2a,  $\kappa$  isotype (eBioscience) was added at 5  $\mu\text{g}/\text{mL}$  Anti-mouse CD3 $\epsilon$  (145-2C11) was from BD Biosciences. The plate-bound CD1d assay has been described (10). Briefly, lipids were loaded into biotinylated CD1d monomers (NIH Tetramer facility) at a 50:1 molar ratio (using the starting lipid equivalent before digestions) in PBS pH 7.4 (Life Technologies) with 0.05% tween-20 (Sigma) for 16 h at  $37^{\circ}\text{C}$ . Lipid-loaded CD1d was bound to a streptavidin-coated plate for 30 min in PBS followed by washing. A total of  $10^5$  cells of a primary mouse iNKT cell line (11) derived from C57BL/6 splenocytes were added for 16 h. For human assays using a primary iNKT cell line (10) or the J3N.5 clone (12), freshly isolated, magnetically sorted (Miltenyi) CD14<sup>+</sup> peripheral blood mononuclear cells were cultured with GM-CSF and IL-4 (Peprotech) to derive antigen-presenting cells, as described (12). iNKT cells ( $5 \times 10^4$ ) were cultured with  $5 \times 10^4$  antigen-presenting cells per well in flat-bottom 96-well plates for 16 h.

All assays were performed in RPMI-1640 media supplemented with 10% FCS (Gemini Bio), penicillin/streptomycin, L-glutamine and  $\beta$ -mercaptoethanol (Life Technologies) at  $37^{\circ}\text{C}$  in 5% CO<sub>2</sub>. Lipids were dried under nitrogen and sonicated in media for assay. ELISA was performed using high capacity 96-well plates (Costar). Mouse IL-2, mouse IFN- $\gamma$ , and human IFN- $\gamma$  for ELISA standards were from Peprotech. For bar graphs and X–Y graphs with error bars shown, SEM is shown.

**L363 Flow Cytometry.** For flow cytometric analysis of L363 binding, RAW-CD1d cells were cultured overnight with 10  $\mu\text{g}/\text{mL}$   $\alpha$ -GlcCer d18:1/24:1 in ultra-low attachment 24-well plates (Corning) at  $5 \times 10^5$  cells per well. Cells were collected the next day and stained with L363-phycoerythrin (eBioscience) for 30 min at  $4^{\circ}\text{C}$  in PBS with 0.5% FBS and 2 mM EDTA (Life Technologies), washed, and analyzed using a FACSCanto II system (BD Biosciences) and analyzed using FlowJo (TreeStar).

**Mass Spectrometry and NMR Spectroscopy.** Collision-induced dissociation tandem mass spectrometry (CID-MS<sup>n</sup>) was performed on a Thermo-Finnigan linear ion-trap mass spectrometer with an Xcalibur operating system at the University of Washington, St. Louis. For large-scale fractionation of cow's milk GlcCer, the fractions indicated in Fig. 6B and Fig. S8B were purified from 50 mg of starting material, and the entire sample was analyzed by direct injection. NMR was performed at the University of Georgia Complex Carbohydrate Research Center. For NMR experiments, samples were dissolved in CD<sub>3</sub>OD and dried under a stream of nitrogen and then dissolved in 0.5 mL of 2:1 CDCl<sub>3</sub>:CD<sub>3</sub>OD. One-dimensional proton and zero-quantum filtered
